**Table S1. Mass, [<sup>2</sup>H]deuterium injectate details, background ( $E_{\text{wat}}$ ), equilibrium ( $E_{2,4,6\text{hr,mix}}$ ) and final ( $E_{\text{final}}$ ) isotope levels, water turnover rates ( $k_d$ ), isotope dilution space ( $N_d$ ), total body water (%TBW), water turnover rate (WTR) and daily water flux (DWF) for 10 female diamondback terrapins from 15 to 29 March (during dormancy) and from 29 March to 5 April (after dormancy).**

| Terrapin                                | ACO       | ACW       | AOP       | AOPW      | AOX       | APQ       | APV       | AQW       | HIJ       | AOV       | Mean ± s.d.      |
|-----------------------------------------|-----------|-----------|-----------|-----------|-----------|-----------|-----------|-----------|-----------|-----------|------------------|
| Plastron length (cm)                    | 13.5      | 13        | 12        | 14        | 13.8      | 14        | 13.2      | 13.3      | 12.9      | 12.9      | 13.26 ± 0.58     |
| Mass at capture (g)                     | 509.20    | 455.10    | 337.10    | 564.80    | 526.10    | 556.00    | 516.30    | 580.80    | 504.80    | 423.30    | 497.35 ± 70.20   |
| 15 to 29 Mar                            |           |           |           |           |           |           |           |           |           |           |                  |
| Mass (g, 15 Mar)                        | 522.10    | 530.10    | 339.10    | 658.80    | 541.50    | 520.10    | 509.10    | 503.10    | 502.70    | 504.80    | 513.14 ± 72.82   |
| Mass (g, 29 Mar)                        | 507.80    | 440.70    | 317.70    | 624.30    | 503.20    | 498.70    | 468.30    | 509.00    | 469.40    | 467.60    | 480.67 ± 71.84   |
| $E_{\text{wat}}$ (0 hrs)                | 134.15    | 160.39    | 134.05    | 137.96    | 137.72    | 135.54    | 145.76    | 136.29    | 134.72    | 134.09    | 139.07 ± 7.85    |
| $E_{\text{inj}}$ (Atom%)                | 820882.88 | 820882.88 | 820882.88 | 820882.88 | 820882.88 | 820882.88 | 820882.88 | 820882.88 | 820882.88 | 820882.88 |                  |
| Molmass <sub>inj</sub>                  | 20.0276   | 20.0276   | 20.0276   | 20.0276   | 20.0276   | 20.0276   | 20.0276   | 20.0276   | 20.0276   | 20.0276   |                  |
| $M_{\text{inj}}$ (g)                    | 0.36      | 0.34      | 0.28      | 0.37      | 0.48      | 0.48      | 0.44      | 0.45      | 0.46      | 0.36      | 0.40 ± 0.06      |
| Mol <sub>inj</sub> (moles)              | 0.02      | 0.02      | 0.01      | 0.02      | 0.02      | 0.02      | 0.02      | 0.02      | 0.02      | 0.02      | 0.02 ± 0.00      |
| $E_{2.5\text{hr}}$ (2.5 hrs)            |           | 758.07    |           |           | 963.22    |           |           | 229.95    | 1025.85   |           | 744.27 ± 313.03  |
| $E_{4.5\text{hr}}$ (4.5 hrs)            |           | 751.17    |           |           | 985.51    |           |           | 1256.67   | 1027.38   |           | 1005.18 ± 179.34 |
| $E_{6\text{hr}}$ (6 hrs)                | 817.03    | 746.91    | 923.19    | 673.27    | 979.6     | 1007.94   | 1639.48   | 1243.08   | 1029.15   |           | 1006.63 ± 274.70 |
| $E_{\text{mix}}$ (4.5–6 hrs)            | 817.03    | 752.05    | 923.19    | 673.27    | 976.11    | 1007.94   | 1639.48   | 1256.67   | 1027.46   |           | 1008.13 ± 275.52 |
| $E_{\text{final}}$ (336 hrs, 13.9 days) | 258.09    | 250.48    | 223.49    | 331.72    | 314.28    | 180.54    | 465.37    | 243.99    | 253.33    | 134.35    | 265.56 ± 85.90   |
| $k_d$ (15 to 29 Mar, hrs)               | 0.005     | 0.006     | 0.006     | 0.003     | 0.005     | 0.009     | 0.005     | 0.007     | 0.006     |           | 0.006 ± 0.00     |
| $k_d$ (15 to 29 Mar, days)              | 0.12      | 0.14      | 0.16      | 0.07      | 0.11      | 0.21      | 0.11      | 0.17      | 0.15      |           | 0.14 ± 0.04      |
| $N_d$ (15 Mar, Mol <sub>wat</sub> )     | 21.35     | 23.59     | 14.73     | 28.52     | 23.56     | 22.37     | 12.05     | 16.61     | 21.03     |           | 20.42 ± 4.80     |
| Terrapin                                | ACO       | ACW       | AOP       | AOPW      | AOX       | APQ       | APV       | AQW       | HIJ       | AOV       | Mean ± s.d.      |
| $N_d$ (g, 15 Mar)                       | 384.38    | 424.63    | 265.24    | 513.43    | 424.05    | 402.69    | 216.96    | 299       | 378.65    |           | 367.67 ± 86.42   |
| %TBW                                    | 73.62     | 80.10     | 78.22     | 77.93     | 78.31     | 77.42     |           | 59.43     | 75.32     |           | 75.05 ± 6.19     |
| WTR (ml day <sup>-1</sup> )             | 47.26     | 57.58     | 41.61     | 37.59     | 47.59     | 86.01     | 24.1      | 50.45     | 55.06     |           | 49.70 ± 15.94    |
| DWF (%TBW day <sup>-1</sup> )           | 9.05      | 10.86     | 12.27     | 5.71      | 8.78      | 16.53     |           | 10.02     | 10.95     |           | 10.52 ± 2.92     |
| 29 Mar to 5 Apr                         |           |           |           |           |           |           |           |           |           |           |                  |

|                                              |           |           |           |           |           |           |           |           |           |           |                     |
|----------------------------------------------|-----------|-----------|-----------|-----------|-----------|-----------|-----------|-----------|-----------|-----------|---------------------|
| Mass (g, 29 Mar)                             | 507.80    | 440.70    | 317.70    | 624.30    | 503.20    | 498.70    | 468.30    | 509.00    | 469.40    | 467.60    | 480.67 ±<br>71.84   |
| E <sub>wat</sub> (0 hrs)                     | 258.09    | 250.48    | 223.49    | 331.72    | 314.28    | 180.54    | 465.37    | 243.99    | 253.33    | 134.35    | 265.56 ±<br>85.90   |
| E <sub>inj</sub> (boost, Atom%)              | 820882.88 | 820882.88 | 820882.88 | 820882.88 | 820882.88 | 820882.88 | 820882.88 | 820882.88 | 820882.88 | 820882.88 |                     |
| M <sub>inj</sub> (g)                         | 0.35      | 0.38      | 0.29      | 0.39      | 0.48      | 0.47      | 0.46      | 0.46      | 0.46      | 0.34      | 0.41 ±<br>0.06      |
| Mol <sub>inj</sub> (moles)                   | 0.02      | 0.02      | 0.01      | 0.02      | 0.02      | 0.02      | 0.02      | 0.02      | 0.02      | 0.02      | 0.02 ±<br>0.00      |
| E <sub>mix</sub> (4 hrs)                     | 1029.48   | 1090.2    | 1064.14   | 911.27    | 1188.11   | 1098.13   | 1430.19   | 1190.14   | 1251.59   | 881.17    | 1113.44 ±<br>153.61 |
| E <sub>final</sub> (172 hrs, 7.2 days)       | 326.43    | 380.74    | 252.38    | 495.45    |           | 270.87    | 526.71    | 473.98    | 388.29    | 270.13    | 376.11 ±<br>98.18   |
| k <sub>d</sub> (29 Mar to 5 Apr, hrs)        | 0.014     | 0.011     | 0.02      | 0.007     |           | 0.013     | 0.016     | 0.008     | 0.012     | 0.01      | 0.012 ±<br>0.00     |
| k <sub>d</sub> (29 Mar to 5 Apr, days)       | 0.34      | 0.26      | 0.47      | 0.18      |           | 0.32      | 0.38      | 0.2       | 0.28      | 0.24      | 0.29 ±<br>0.09      |
| N <sub>d</sub> (29 Mar, Mol <sub>wat</sub> ) | 18.42     | 18.57     | 14.12     | 27.2      | 22.47     | 20.8      | 19.45     | 19.95     | 18.95     | 18.79     | 19.87 ±<br>3.17     |
| N <sub>d</sub> (g, 29 Mar)                   | 331.6     | 334.34    | 254.12    | 489.62    | 404.47    | 374.38    | 350.11    | 359.22    | 341.11    | 338.22    | 357.72 ±<br>57.04   |
| %TBW                                         | 65.3      | 75.87     | 81.27     | 78.43     | 80.38     | 75.07     | 74.76     | 71.27     | 73.45     | 72.33     | 74.54 ±<br>4.36     |
| WTR (ml day <sup>-1</sup> )                  | 111.47    | 86.42     | 118.81    | 85.84     |           | 120.37    | 133.81    | 70.47     | 94.67     | 79.97     | 100.20 ±<br>20.36   |
| DWF (%TBW day <sup>-1</sup> )                | 21.95     | 19.61     | 37.39     | 13.75     |           | 24.13     | 28.57     | 13.84     | 20.17     | 17.10     | 21.84 ±<br>7.30     |
